# Supplementary material for: Methods for randomized, blinded, controlled evaluation of putative disease interventions in multilaboratory, preclinical assessment networks
Source: Lab Anim (NY). 2026 Feb 18;55(3):74–82. doi: 10.1038/s41684-026-01683-z (PMC12956586; doi:10.1038/s41684-026-01683-z)
Supplement: Supplementary file 2 — Supplementary Table 3: Research laboratory sample scheduling timeline. Supplementary Table 4: Sample-blinded MISS used for tracking inventory, vial assignments, expiration and dose. Supplementary Table 5: Formulas and conditions used to create the MISS Excel file. [file 41684_2026_1683_MOESM2_ESM.xlsx]

## Sheet: Table 3
week of	Block #	Site 1	Site 2	Site 3	Site 4	Site 5	Site 6			Site	model assignment
2021-10-18										1	SHR/Obesity Induced
2021-10-25				start feeding 4m 4f HFD	start feeding 4m 4f HFD			Notes: Site may choose to start 1 or 2 extra mice per block on HFD in case of malocclusion		2	Obesity Induced/Aged
2021-11-01				start feeding 4m 4f HFD	start feeding 4m 4f HFD					3	Aged/SHR
2021-11-08		start feeding 4m 4f HFD	start feeding 4m 4f HFD							4	SHR/Obesity Induced
2021-11-15		start feeding 4m 4f HFD	start feeding 4m 4f HFD							5	Aged/SHR
2021-11-22				start feeding 4m 4f HFD	start feeding 4m 4f HFD					6	Obesity Induced/Aged
2021-11-29				start feeding 4m 4f HFD	start feeding 4m 4f HFD	15m 15f AGED arrive NIA	15m 15f AGED arrive NIA	Notes: Sites will only use 16/30 AGED mice from the first shipment for Block 1 or 2. Remainder will be used for Block 2 or 3.
2021-12-06		start feeding 4m 4f HFD	start feeding 4m 4f HFD					Notes: 14 AGED mice from first shipment will be used for blocks 3 and 4. 4 mice from shipment 2 will be used.
2021-12-13		start feeding 4m 4f HFD	start feeding 4m 4f HFD	15m 15f AGED arrive NIA	15m 15f AGED arrive NIA			Notes: 3 shipments of AGED mice per site needed; 66/90 used (may need to decrease 3rd shipment number)
2021-12-20				start feeding 5m 5f HFD	start feeding 5m 5f HFD			branching point for number of intervention carried forward.
2021-12-27				start feeding 5m 5f HFD	start feeding 5m 5f HFD
2022-01-03		start feeding 5m 5f HFD	start feeding 5m 5f HFD
2022-01-10		start feeding 5m 5f HFD	start feeding 5m 5f HFD			15m 15f AGED arrive NIA	15m 15f AGED arrive NIA
2022-01-17	1	4m 4f SHR MCAO	4m 4f SHR MCAO	4m 4f OB MCAO; start feeding 4m 4f HFD RIC	4m 4f OB MCAO; start feeding 4m 4f HFD RIC	4m 4f AGED MCAO	4m 4f AGED MCAO	IV/IP
2022-01-24	1	4m 4f SHR MCAO; start feeding 4m 4f HFD RIC	4m 4f SHR MCAO; start feeding 4m 4f HFD RIC	4m 4f OB MCAO	4m 4f OB MCAO	4m 4f AGED MCAO	4m 4f AGED MCAO	IV/IP
2022-01-31	2	4m 4f OB MCAO	4m 4f OB MCAO	4m 4f AGED MCAO; start feeding 4m 4f HFD RIC	4m 4f AGED MCAO; start feeding 4m 4f HFD RIC	4m 4f SHR MCAO	4m 4f SHR MCAO	IV/IP
2022-02-07	2	4m 4f OB MCAO; start feeding 4m 4f HFD RIC	4m 4f OB MCAO; start feeding 4m 4f HFD RIC	4m 4f AGED MCAO	4m 4f AGED MCAO	4m 4f SHR MCAO	4m 4f SHR MCAO	IV/IP
2022-02-14	3	4m 4f SHR MCAO	4m 4f SHR MCAO	4m 4f OB MCAO; 15m 15f AGED arrive NIA	4m 4f OB MCAO; 15m 15f AGED arrive NIA	4m 4f AGED MCAO	4m 4f AGED MCAO	IV/IP
2022-02-21	3	4m 4f SHR MCAO	4m 4f SHR MCAO	4m 4f OB MCAO	4m 4f OB MCAO	4m 4f AGED MCAO	4m 4f AGED MCAO	IV/IP
2022-02-28	4	4m 4f OB MCAO	4m 4f OB MCAO	4m 4f AGED MCAO	4m 4f AGED MCAO	4m 4f SHR MCAO	4m 4f SHR MCAO	IV/IP
2022-03-07	4	4m 4f OB MCAO	4m 4f OB MCAO	4m 4f AGED MCAO	4m 4f AGED MCAO	4m 4f SHR MCAO	4m 4f SHR MCAO	IV/IP
2022-03-14	5	4.5m 4.5f SHR MCAO	4.5m 4.5f SHR MCAO	4.5m 4.5f OB MCAO; 15 AGED mice arrive NIA	4.5m 4.5f OB MCAO; 15 AGED mice arrive NIA	4.5m 4.5f AGED MCAO; 15 AGED mice arrive NIA	4.5m 4.5f AGED MCAO; 15 AGED mice arrive NIA	IV/IP	NOTE: each week of block 5 and 6 will have either 4M/5F or 5M/4F
2022-03-21	5	4.5m 4.5f SHR MCAO	4.5m 4.5f SHR MCAO	4.5m 4.5f OB MCAO	4.5m 4.5f OB MCAO	4.5m 4.5f AGED MCAO	4.5m 4.5f AGED MCAO	IV/IP	CC will alert each site how many males and females to submit ITTs for based on the randomization charts
2022-03-28	6	4.5m 4.5f OB MCAO	4.5m 4.5f OB MCAO	4.5m 4.5f AGED MCAO	4.5m 4.5f AGED MCAO	4.5m 4.5f SHR MCAO	4.5m 4.5f SHR MCAO	IV/IP
2022-04-04	6	4.5m 4.5f OB MCAO	4.5m 4.5f OB MCAO	4.5m 4.5f AGED MCAO	4.5m 4.5f AGED MCAO	4.5m 4.5f SHR MCAO	4.5m 4.5f SHR MCAO	IV/IP
2022-04-11	7	4m 4f SHR MCAO	4m 4f SHR MCAO	4m 4f OB MCAO	4m 4f OB MCAO	4m 4f AGED MCAO	4m 4f AGED MCAO	RIC
2022-04-18	8	4m 4f OB MCAO	4m 4f OB MCAO	4m 4f AGED MCAO	4m 4f AGED MCAO	4m 4f SHR MCAO	4m 4f SHR MCAO	RIC
2022-04-25	9	4m 4f SHR MCAO	4m 4f SHR MCAO	4m 4f OB MCAO	4m 4f OB MCAO	4m 4f AGED MCAO	4m 4f AGED MCAO	RIC
2022-05-02	10	4m 4f OB MCAO	4m 4f OB MCAO	4m 4f AGED MCAO	4m 4f AGED MCAO	4m 4f SHR MCAO	4m 4f SHR MCAO	RIC	end of 30 day survival for IV/IP
2022-05-09
2022-05-16
2022-05-23
2022-05-30		sac	sac	sac	sac	sac	sac
2022-06-06
2022-06-13
2022-06-20
2022-06-27
2022-07-04
2022-07-11
2022-07-18

## Sheet: Table 4 
randomization place	anticipated surgery date	species	Model	sex	Treatment vial ID	Type of administration	site	treatment	Treatment box #	weight (g)	weight (kg)	animal ID assignment	Randomization performed by	date randomized	verifier initials	date verified and locked	diluent	dose rate (mg/kg)	dose (mg)	Volume water to add (mls)	Dose of treatment (mls)	Rate of Infusion (ml/hr)	working concentration (mg/ml)	number of doses	total volume needed to package	date packaged	lot number of stock	expiration date	date shipped	comments						8M	8F
	2022-01-18	mouse	aged	M	CC390	IP	CC	IP B	CC-J-IP	46.2	0.0462	KX0819	JL	2022-01-12	KN	2022-01-13	water	10	0.462	4.4	0.03696		12.5	8	0.29568	2021-11-16	105628-07-7	2022-05-16	2022-01-04
		mouse	aged		CC391	IP	CC	IP A	CC-J-IP		0						water	0.5	0	4.4	0		12.5	8	0	2021-11-16		2022-05-16	2022-01-04
	2022-01-18	mouse	aged	F	CC392	IP	CC	IP F	CC-J-IP	35.1	0.0351	QC3619	JL	2022-01-12	KN	2022-01-13	water	72	2.5272	4.4	0.202176		12.5	8	1.61741	2021-11-08	Y353366	2022-05-08	2022-01-04
	2022-01-25	mouse	aged	F	CC393	IP	CC	IP B	CC-J-IP	31.2	0.0312	AM5215	JL	2022-01-18	KN	2022-01-18	water	10	0.312	4.4	0.02496		12.5	8	0.19968	2021-11-16	105628-07-7	2022-05-16	2022-01-04	mouse
		mouse	aged		CC394	IP	CC	IP A	CC-J-IP		0						water	0.5	0	4.4	0		12.5	8	0	2021-11-16		2022-05-16	2022-01-04	IP	CC-J-IP
		mouse	aged		CC395	IP	CC	IP F	CC-J-IP		0						water	72	0	4.4	0		12.5	8	0	2021-11-08	Y353366	2022-05-08	2022-01-04	5ml	CC390 IP B	CC391 IP A	CC392 IP F
	2022-01-25	mouse	aged	M	CC396	IP	CC	IP B	CC-J-IP	36.3	0.0363	QC3618	JL	2022-01-18	KN	2022-01-18	water	10	0.363	4.4	0.02904		12.5	8	0.23232	2021-11-16	105628-07-7	2022-05-16	2022-01-04		CC393 IP B	CC394 IP A	CC395 IP F
		mouse	aged		CC397	IP	CC	IP A	CC-J-IP		0						water	0.5	0	4.4	0		12.5	8	0	2021-11-16		2022-05-16	2022-01-04		CC396 IP B	CC397 IP A	CC398 IP F
		mouse	aged		CC398	IP	CC	IP F	CC-J-IP		0						water	72	0	4.4	0		12.5	8	0	2021-11-08	Y353366	2022-05-08	2022-01-04		CC399 IP B	CC400 IP A	CC401 IP F
	2022-01-25	mouse	aged	F	CC399	IP	CC	IP B	CC-J-IP	23.8	0.0238	FR5694	JL	2022-01-18	KN	2022-01-18	water	10	0.238	4.4	0.01904		12.5	8	0.15232	2021-11-16	105628-07-7	2022-05-16	2022-01-04		CC402 IP B	CC403 IP A	CC404 IP F
		mouse	aged		CC400	IP	CC	IP A	CC-J-IP		0						water	0.5	0	4.4	0		12.5	8	0	2021-11-16		2022-05-16	2022-01-04
		mouse	aged		CC401	IP	CC	IP F	CC-J-IP		0						water	72	0	4.4	0		12.5	8	0	2021-11-08	Y353366	2022-05-08	2022-01-04
		mouse	aged		CC402	IP	CC	IP B	CC-J-IP		0						water	10	0	4.4	0		12.5	8	0	2021-11-16	105628-07-7	2022-05-16	2022-01-04
		mouse	aged		CC403	IP	CC	IP A	CC-J-IP		0						water	0.5	0	4.4	0		12.5	8	0	2021-11-16		2022-05-16	2022-01-04
		mouse	aged		CC404	IP	CC	IP F	CC-J-IP		0						water	72	0	4.4	0		12.5	8	0	2021-11-08	Y353366	2022-05-08	2022-01-04
	2022-01-18	mouse	aged	M	CC405	IV	CC	IV D	CC-J-IV	46.1	0.0461	FR5693	JL	2022-01-12	KN	2022-01-13	na	100	4.61		0.3688	1.1064	12.5	1.5	0.5532	2021-12-10	B3041B05	2023-12-30	2022-01-04
		mouse	aged		CC406	IV	CC	IV E	CC-J-IV		0						na	10	0		0	0	12.5	1.5	0	2021-12-17	6102130	2022-02-17	2022-01-04	mouse
	2022-01-25	mouse	aged	M	CC407	IV	CC	IV C	CC-J-IV	41.9	0.0419	VH2637	JL	2022-01-18	KN	2022-01-18	na	16	0.6704		0.053632	0.160896	12.5	1.5	0.080448	2021-12-17	BCCB2049	2022-02-17	2022-01-04	IV	CC-J-IV
	2022-01-18	mouse	aged	F	CC408	IV	CC	IV F	CC-J-IV	35.6	0.0356	VH2638	JL	2022-01-12	KN	2022-01-13	na	72	2.5632		0.205056	0.615168	12.5	1.5	0.307584	2021-11-08	Y341271	2022-05-08	2022-01-04	2ml	CC405 IV D	CC406 IV E	CC407 IV C	CC408 IV F
	2022-01-26	mouse	aged	M	CC409	IV	CC	IV D	CC-J-IV	39.2	0.0392	AM5214	JL	2022-01-19	KN	2022-01-19	na	100	3.92		0.3136	0.9408	12.5	1.5	0.4704	2021-12-10	B3041B05	2023-12-30	2022-01-04		CC409 IV D	CC410 IV E	CC411 IV C	CC412 IV F
		mouse	aged		CC410	IV	CC	IV E	CC-J-IV		0						na	10	0		0	0	12.5	1.5	0	2021-12-17	6102130	2022-02-17	2022-01-04		CC413 IV D	CC414 IV E	CC415 IV C	CC416 IV F
	2022-01-26	mouse	aged	M	CC411	IV	CC	IV C	CC-J-IV	44.7	0.0447	FR5695	JL	2022-01-19	KN	2022-01-19	na	16	0.7152		0.057216	0.171648	12.5	1.5	0.085824	2021-12-17	BCCB2049	2022-02-17	2022-01-04		CC417 IV D	CC418 IV E	CC419 IV C	CC420 IV F
		mouse	aged		CC412	IV	CC	IV F	CC-J-IV		0						na	72	0		0	0	12.5	1.5	0	2021-11-08	Y341271	2022-05-08	2022-01-04		CC421 IV D	CC422 IV E	CC423 IV C	CC424 IV F
	2022-02-02	mouse	aged	F	CC413	IV	CC	IV D	CC-J-IV	34.2	0.0342	QM4341	JL	2022-01-26	KN	2022-01-26	na	100	3.42		0.2736	0.8208	12.5	1.5	0.4104	2021-12-10	B3041B05	2023-12-30	2022-01-04
		mouse	aged		CC414	IV	CC	IV E	CC-J-IV		0						na	10	0		0	0	12.5	1.5	0	2021-12-17	6102130	2022-02-17	2022-01-04
	2022-02-02	mouse	aged	F	CC415	IV	CC	IV C	CC-J-IV	32.2	0.0322	LH0141	JL	2022-01-26	KN	2022-01-26	na	16	0.5152		0.041216	0.123648	12.5	1.5	0.061824	2021-12-17	BCCB2049	2022-02-17	2022-01-04
		mouse	aged		CC416	IV	CC	IV F	CC-J-IV		0						na	72	0		0	0	12.5	1.5	0	2021-11-08	Y341271	2022-05-08	2022-01-04
		mouse	aged		CC417	IV	CC	IV D	CC-J-IV		0						na	100	0		0	0	12.5	1.5	0	2021-12-10	B3041B05	2023-12-30	2022-01-04
		mouse	aged		CC418	IV	CC	IV E	CC-J-IV		0						na	10	0		0	0	12.5	1.5	0	2021-12-17	6102130	2022-02-17	2022-01-04
		mouse	aged		CC419	IV	CC	IV C	CC-J-IV		0						na	16	0		0	0	12.5	1.5	0	2021-12-17	BCCB2049	2022-02-17	2022-01-04
		mouse	aged		CC420	IV	CC	IV F	CC-J-IV		0						na	72	0		0	0	12.5	1.5	0	2021-11-08	Y341271	2022-05-08	2022-01-04
		mouse	aged		CC421	IV	CC	IV D	CC-J-IV		0						na	100	0		0	0	12.5	1.5	0	2021-12-10	B3041B05	2023-12-30	2022-01-04
		mouse	aged		CC422	IV	CC	IV E	CC-J-IV		0						na	10	0		0	0	12.5	1.5	0	2021-12-17	6102130	2022-02-17	2022-01-04
		mouse	aged		CC423	IV	CC	IV C	CC-J-IV		0						na	16	0		0	0	12.5	1.5	0	2021-12-17	BCCB2049	2022-02-17	2022-01-04
		mouse	aged		CC424	IV	CC	IV F	CC-J-IV		0						na	72	0		0	0	12.5	1.5	0	2021-11-08	Y341271	2022-05-08	2022-01-04
	2022-02-07	rat	SHR	F	CC425	IP	CC	IP B	CC-K-IP	191.8	0.1918	VR2920	JL	2022-02-01			water	10	1.918	27.2	0.15344		12.5	8	1.22752	2021-11-16	105628-07-7	2022-05-16	2022-01-04
		rat	SHR		CC426	IP	CC	IP A	CC-K-IP		0						water	0.5	0	27.2	0		12.5	8	0	2021-11-16		2022-05-16	2022-01-04
	2022-02-07	rat	SHR	F	CC427	IP	CC	IP F	CC-K-IP	196.3	0.1963	AW6740	JL	2022-02-01			water	72	14.1336	27.2	1.13069		12.5	8	9.0455	2021-11-08	Y353366	2022-05-08	2022-01-04
	2022-02-08	rat	SHR	M	CC428	IP	CC	IP B	CC-K-IP	302.8	0.3028	VR2921	JL	2022-02-01			water	10	3.028	27.2	0.24224		12.5	8	1.93792	2021-11-16	105628-07-7	2022-05-16	2022-01-04	rat
		rat	SHR		CC429	IP	CC	IP A	CC-K-IP		0						water	0.5	0	27.2	0		12.5	8	0	2021-11-16		2022-05-16	2022-01-04	IP	CC-K-IP
		rat	SHR		CC430	IP	CC	IP F	CC-K-IP		0						water	72	0	27.2	0		12.5	8	0	2021-11-08	Y353366	2022-05-08	2022-01-04	30ml	CC425 IP B	CC426 IP A	CC427 IP F
	2022-02-09	rat	SHR	M	CC431	IP	CC	IP B	CC-K-IP	291.7	0.2917	QM4343	JL	2022-02-01			water	10	2.917	27.2	0.23336		12.5	8	1.86688	2021-11-16	105628-07-7	2022-05-16	2022-01-04		CC428 IP B	CC429 IP A	CC430 IP F
		rat	SHR		CC432	IP	CC	IP A	CC-K-IP		0						water	0.5	0	27.2	0		12.5	8	0	2021-11-16		2022-05-16	2022-01-04		CC431 IP B	CC432 IP A	CC433 IP F
		rat	SHR		CC433	IP	CC	IP F	CC-K-IP		0						water	72	0	27.2	0		12.5	8	0	2021-11-08	Y353366	2022-05-08	2022-01-04		CC434 IP B	CC435 IP A	CC436 IP F
		rat	SHR		CC434	IP	CC	IP B	CC-K-IP		0						water	10	0	27.2	0		12.5	8	0	2021-11-16	105628-07-7	2022-05-16	2022-01-04		CC437 IP B	CC438 IP A	CC439 IP F
		rat	SHR		CC435	IP	CC	IP A	CC-K-IP		0						water	0.5	0	27.2	0		12.5	8	0	2021-11-16		2022-05-16	2022-01-04
		rat	SHR		CC436	IP	CC	IP F	CC-K-IP		0						water	72	0	27.2	0		12.5	8	0	2021-11-08	Y353366	2022-05-08	2022-01-04
		rat	SHR		CC437	IP	CC	IP B	CC-K-IP		0						water	10	0	27.2	0		12.5	8	0	2021-11-16	105628-07-7	2022-05-16	2022-01-04
		rat	SHR		CC438	IP	CC	IP A	CC-K-IP		0						water	0.5	0	27.2	0		12.5	8	0	2021-11-16		2022-05-16	2022-01-04
		rat	SHR		CC439	IP	CC	IP F	CC-K-IP		0						water	72	0	27.2	0		12.5	8	0	2021-11-08	Y353366	2022-05-08	2022-01-04
	2022-02-07	rat	SHR	M	CC440	IV	CC	IV D	CC-K-IV	322.6	0.3226	LH0143	JL	2022-02-01			na	10	3.226		0.25808	0.77424	12.5	1.5	0.38712	2022-12-10	B4003B04	2022-12-20	2022-01-04
		rat	SHR		CC441	IV	CC	IV E	CC-K-IV		0						na	10	0		0	0	12.5	1.5	0	2021-12-17	6102130	2022-02-17	2022-01-04	rat
	2022-02-08	rat	SHR	M	CC442	IV	CC	IV C	CC-K-IV	320.8	0.3208	AW6741	JL	2022-02-01			na	16	5.1328		0.410624	1.23187	12.5	1.5	0.615936	2021-12-17	BCCB2049	2022-02-17	2022-01-04	IV	CC-K-IV
	2022-02-07	rat	SHR	M	CC443	IV	CC	IV F	CC-K-IV	317.2	0.3172	GC0740	JL	2022-02-01			na	72	22.8384		1.82707	5.48122	12.5	1.5	2.74061	2021-11-08	Y341271	2022-05-08	2022-01-04	5ml	CC440 IV D	CC441 IV E	CC442 IV C	CC443 IV F
	2022-02-08	rat	SHR	F	CC444	IV	CC	IV D	CC-K-IV	201.7	0.2017	LH0142	JL	2022-02-01			na	10	2.017		0.16136	0.48408	12.5	1.5	0.24204	2022-12-10	B4003B04	2022-12-20	2022-01-04		CC444 IV D	CC445 IV E	CC446 IV C	CC447 IV F
		rat	SHR		CC445	IV	CC	IV E	CC-K-IV		0						na	10	0		0	0	12.5	1.5	0	2021-12-17	6102130	2022-02-17	2022-01-04		CC448 IV D	CC449 IV E	CC450 IV C	CC451 IV F
	2022-02-09	rat	SHR	M	CC446	IV	CC	IV C	CC-K-IV	297.6	0.2976	VR2922	JL	2022-02-01			na	16	4.7616		0.380928	1.14278	12.5	1.5	0.571392	2021-12-17	BCCB2049	2022-02-17	2022-01-04		CC452 IV D	CC453 IV E	CC454 IV C	CC455 IV F
		rat	SHR		CC447	IV	CC	IV F	CC-K-IV		0						na	72	0		0	0	12.5	1.5	0	2021-11-08	Y341271	2022-05-08	2022-01-04		CC456 IV D	CC457 IV E	CC458 IV C	CC459 IV F
	2022-02-08	rat	SHR	F	CC448	IV	CC	IV D	CC-K-IV	184.2	0.1842	QM4342	JL	2022-02-01			na	10	1.842		0.14736	0.44208	12.5	1.5	0.22104	2022-12-10	B4003B04	2022-12-20	2022-01-04
		rat	SHR		CC449	IV	CC	IV E	CC-K-IV		0						na	10	0		0	0	12.5	1.5	0	2021-12-17	6102130	2022-02-17	2022-01-04
		rat	SHR		CC450	IV	CC	IV C	CC-K-IV		0						na	16	0		0	0	12.5	1.5	0	2021-12-17	BCCB2049	2022-02-17	2022-01-04
		rat	SHR		CC451	IV	CC	IV F	CC-K-IV		0						na	72	0		0	0	12.5	1.5	0	2021-11-08	Y341271	2022-05-08	2022-01-04
		rat	SHR		CC452	IV	CC	IV D	CC-K-IV		0						na	10	0		0	0	12.5	1.5	0	2022-12-10	B4003B04	2022-12-20	2022-01-04
		rat	SHR		CC453	IV	CC	IV E	CC-K-IV		0						na	10	0		0	0	12.5	1.5	0	2021-12-17	6102130	2022-02-17	2022-01-04
		rat	SHR		CC454	IV	CC	IV C	CC-K-IV		0						na	16	0		0	0	12.5	1.5	0	2021-12-17	BCCB2049	2022-02-17	2022-01-04
		rat	SHR		CC455	IV	CC	IV F	CC-K-IV		0						na	72	0		0	0	12.5	1.5	0	2021-11-08	Y341271	2022-05-08	2022-01-04
		rat	SHR		CC456	IV	CC	IV D	CC-K-IV		0						na	10	0		0	0	12.5	1.5	0	2022-12-10	B4003B04	2022-12-20	2022-01-04
		rat	SHR		CC457	IV	CC	IV E	CC-K-IV		0						na	10	0		0	0	12.5	1.5	0	2021-12-17	6102130	2022-02-17	2022-01-04
		rat	SHR		CC458	IV	CC	IV C	CC-K-IV		0						na	16	0		0	0	12.5	1.5	0	2021-12-17	BCCB2049	2022-02-17	2022-01-04
		rat	SHR		CC459	IV	CC	IV F	CC-K-IV		0						na	72	0		0	0	12.5	1.5	0	2021-11-08	Y341271	2022-05-08	2022-01-04
	2022-02-14	mouse	aged		CC460	IP	CC	IP B	CC-L-IP		0						water	10	0	3.9	0		12.5	8	0	2022-01-31	L10381B006	2022-07-31	2022-02-07
	2022-02-21	mouse	aged		CC461	IP	CC	IP F	CC-L-IP		0						water	72	0	4.4	0		12.5	8	0	2022-01-31	Y353366	2022-07-31	2022-02-07
	2022-03-14	mouse	aged		CC462	IP	CC	IP F	CC-L-IP		0						water	72	0	4.4	0		12.5	8	0	2021-11-08	Y353366	2022-05-08	2022-02-07
		mouse	aged		CC463	IP	CC	IP B	CC-L-IP		0						water	10	0	3.9	0		12.5	8	0	2022-01-31	L10381B006	2022-07-31	2022-02-07	mouse
		mouse	aged		CC464	IP	CC	IP F	CC-L-IP		0						water	72	0	4.4	0		12.5	8	0	2022-01-31	Y353366	2022-07-31	2022-02-07	IP	CC-L-IP
		mouse	aged		CC465	IP	CC	IP F	CC-L-IP		0						water	72	0	4.4	0		12.5	8	0	2021-11-08	Y353366	2022-05-08	2022-02-07	5ml	CC460 IP B	CC461 IP F	CC462 IP F
		mouse	aged		CC466	IP	CC	IP B	CC-L-IP		0						water	10	0	3.9	0		12.5	8	0	2022-01-31	L10381B006	2022-07-31	2022-02-07		CC463 IP B	CC464 IP F	CC465 IP F
		mouse	aged		CC467	IP	CC	IP F	CC-L-IP		0						water	72	0	4.4	0		12.5	8	0	2022-01-31	Y353366	2022-07-31	2022-02-07		CC466 IP B	CC467 IP F	CC468 IP F
		mouse	aged		CC468	IP	CC	IP F	CC-L-IP		0						water	72	0	4.4	0		12.5	8	0	2021-11-08	Y353366	2022-05-08	2022-02-07		CC469 IP B	CC470 IP F	CC471 IP F
		mouse	aged		CC469	IP	CC	IP B	CC-L-IP		0						water	10	0	3.9	0		12.5	8	0	2022-01-31	L10381B006	2022-07-31	2022-02-07		CC472 IP B	CC473 IP F	CC474 IP F
		mouse	aged		CC470	IP	CC	IP F	CC-L-IP		0						water	72	0	4.4	0		12.5	8	0	2022-01-31	Y353366	2022-07-31	2022-02-07
		mouse	aged		CC471	IP	CC	IP F	CC-L-IP		0						water	72	0	4.4	0		12.5	8	0	2021-11-08	Y353366	2022-05-08	2022-02-07
		mouse	aged		CC472	IP	CC	IP B	CC-L-IP		0						water	10	0	3.9	0		12.5	8	0	2022-01-31	L10381B006	2022-07-31	2022-02-07
		mouse	aged		CC473	IP	CC	IP F	CC-L-IP		0						water	72	0	4.4	0		12.5	8	0	2022-01-31	Y353366	2022-07-31	2022-02-07
		mouse	aged		CC474	IP	CC	IP F	CC-L-IP		0						water	72	0	4.4	0		12.5	8	0	2021-11-08	Y353366	2022-05-08	2022-02-07
		mouse	aged		CC475	IV	CC	IV D	CC-L-IV		0						na	100	0		0	0	12.5	1.5	0	2022-01-31	B5003B01	2023-12-31	2022-02-07
		mouse	aged		CC476	IV	CC	IV F	CC-L-IV		0						na	72	0		0	0	12.5	1.5	0	2021-11-08	Y341271	2022-05-08	2022-02-07	mouse
		mouse	aged		CC477	IV	CC	IV C	CC-L-IV		0						na	16	0		0	0	12.5	1.5	0	2022-02-07	BCCB2049	2022-04-07	2022-02-07	IV	CC-L-IV
		mouse	aged		CC478	IV	CC	IV C	CC-L-IV		0						na	16	0		0	0	12.5	1.5	0	2022-02-07	BCCB2049	2022-04-07	2022-02-07	2ml	CC475 IV D	CC476 IV F	CC477 IV C	CC478 IV C
		mouse	aged		CC479	IV	CC	IV D	CC-L-IV		0						na	100	0		0	0	12.5	1.5	0	2022-01-31	B5003B01	2023-12-31	2022-02-07		CC479 IV D	CC480 IV F	CC481 IV C	CC482 IV C
		mouse	aged		CC480	IV	CC	IV F	CC-L-IV		0						na	72	0		0	0	12.5	1.5	0	2021-11-08	Y341271	2022-05-08	2022-02-07		CC483 IV D	CC484 IV F	CC485 IV C	CC486 IV C
		mouse	aged		CC481	IV	CC	IV C	CC-L-IV		0						na	16	0		0	0	12.5	1.5	0	2022-02-07	BCCB2049	2022-04-07	2022-02-07		CC487 IV D	CC488 IV F	CC489 IV C	CC490 IV C
		mouse	aged		CC482	IV	CC	IV C	CC-L-IV		0						na	16	0		0	0	12.5	1.5	0	2022-02-07	BCCB2049	2022-04-07	2022-02-07		CC491 IV D	CC492 IV F	CC493 IV C	CC494 IV C
		mouse	aged		CC483	IV	CC	IV D	CC-L-IV		0						na	100	0		0	0	12.5	1.5	0	2022-01-31	B5003B01	2023-12-31	2022-02-07
		mouse	aged		CC484	IV	CC	IV F	CC-L-IV		0						na	72	0		0	0	12.5	1.5	0	2021-11-08	Y341271	2022-05-08	2022-02-07
		mouse	aged		CC485	IV	CC	IV C	CC-L-IV		0						na	16	0		0	0	12.5	1.5	0	2022-02-07	BCCB2049	2022-04-07	2022-02-07
		mouse	aged		CC486	IV	CC	IV C	CC-L-IV		0						na	16	0		0	0	12.5	1.5	0	2022-02-07	BCCB2049	2022-04-07	2022-02-07
		mouse	aged		CC487	IV	CC	IV D	CC-L-IV		0						na	100	0		0	0	12.5	1.5	0	2022-01-31	B5003B01	2023-12-31	2022-02-07
		mouse	aged		CC488	IV	CC	IV F	CC-L-IV		0						na	72	0		0	0	12.5	1.5	0	2021-11-08	Y341271	2022-05-08	2022-02-07
		mouse	aged		CC489	IV	CC	IV C	CC-L-IV		0						na	16	0		0	0	12.5	1.5	0	2022-02-07	BCCB2049	2022-04-07	2022-02-07
		mouse	aged		CC490	IV	CC	IV C	CC-L-IV		0						na	16	0		0	0	12.5	1.5	0	2022-02-07	BCCB2049	2022-04-07	2022-02-07
		mouse	aged		CC491	IV	CC	IV D	CC-L-IV		0						na	100	0		0	0	12.5	1.5	0	2022-01-31	B5003B01	2023-12-31	2022-02-07
		mouse	aged		CC492	IV	CC	IV F	CC-L-IV		0						na	72	0		0	0	12.5	1.5	0	2021-11-08	Y341271	2022-05-08	2022-02-07
		mouse	aged		CC493	IV	CC	IV C	CC-L-IV		0						na	16	0		0	0	12.5	1.5	0	2022-02-07	BCCB2049	2022-04-07	2022-02-07
		mouse	aged		CC494	IV	CC	IV C	CC-L-IV		0						na	16	0		0	0	12.5	1.5	0	2022-02-07	BCCB2049	2022-04-07	2022-02-07
	2022-02-28	rat	SHR		CC495	IP	CC	IP B	CC-M-IP		0						water	10	0	27.2	0		12.5	8	0	2022-01-31	L10381B006	2022-07-31	2022-02-07
	2022-03-07	rat	SHR		CC496	IP	CC	IP F	CC-M-IP		0						water	72	0	27.2	0		12.5	8	0	2022-01-31	Y353366	2022-07-31	2022-02-07
	2022-03-21	rat	SHR		CC497	IP	CC	IP F	CC-M-IP		0						water	72	0	27.2	0		12.5	8	0	2021-11-08	Y353366	2022-05-08	2022-02-07
		rat	SHR		CC498	IP	CC	IP B	CC-M-IP		0						water	10	0	27.2	0		12.5	8	0	2022-01-31	L10381B006	2022-07-31	2022-02-07	rat
		rat	SHR		CC499	IP	CC	IP F	CC-M-IP		0						water	72	0	27.2	0		12.5	8	0	2022-01-31	Y353366	2022-07-31	2022-02-07	IP	CC-M-IP
		rat	SHR		CC500	IP	CC	IP F	CC-M-IP		0						water	72	0	27.2	0		12.5	8	0	2021-11-08	Y353366	2022-05-08	2022-02-07	30ml	CC495 IP B	CC496 IP F	CC497 IP F
		rat	SHR		CC501	IP	CC	IP B	CC-M-IP		0						water	10	0	27.2	0		12.5	8	0	2022-01-31	L10381B006	2022-07-31	2022-02-07		CC498 IP B	CC499 IP F	CC500 IP F
		rat	SHR		CC502	IP	CC	IP F	CC-M-IP		0						water	72	0	27.2	0		12.5	8	0	2022-01-31	Y353366	2022-07-31	2022-02-07		CC501 IP B	CC502 IP F	CC503 IP F
		rat	SHR		CC503	IP	CC	IP F	CC-M-IP		0						water	72	0	27.2	0		12.5	8	0	2021-11-08	Y353366	2022-05-08	2022-02-07		CC504 IP B	CC505 IP F	CC506 IP F
		rat	SHR		CC504	IP	CC	IP B	CC-M-IP		0						water	10	0	27.2	0		12.5	8	0	2022-01-31	L10381B006	2022-07-31	2022-02-07		CC507 IP B	CC508 IP F	CC509 IP F
		rat	SHR		CC505	IP	CC	IP F	CC-M-IP		0						water	72	0	27.2	0		12.5	8	0	2022-01-31	Y353366	2022-07-31	2022-02-07
		rat	SHR		CC506	IP	CC	IP F	CC-M-IP		0						water	72	0	27.2	0		12.5	8	0	2021-11-08	Y353366	2022-05-08	2022-02-07
		rat	SHR		CC507	IP	CC	IP B	CC-M-IP		0						water	10	0	27.2	0		12.5	8	0	2022-01-31	L10381B006	2022-07-31	2022-02-07
		rat	SHR		CC508	IP	CC	IP F	CC-M-IP		0						water	72	0	27.2	0		12.5	8	0	2022-01-31	Y353366	2022-07-31	2022-02-07
		rat	SHR		CC509	IP	CC	IP F	CC-M-IP		0						water	72	0	27.2	0		12.5	8	0	2021-11-08	Y353366	2022-05-08	2022-02-07
		rat	SHR		CC510	IV	CC	IV D	CC-M-IV		0						na	10	0		0	0	12.5	1.5	0	2022-01-31	B3041B05/B4003B04	2022-12-31	2022-02-07
		rat	SHR		CC511	IV	CC	IV F	CC-M-IV		0						na	72	0		0	0	12.5	1.5	0	2021-11-08	Y341271	2022-05-08	2022-02-07	rat
		rat	SHR		CC512	IV	CC	IV C	CC-M-IV		0						na	16	0		0	0	12.5	1.5	0	2022-02-07	BCCB2049	2022-04-07	2022-02-07	IV	CC-M-IV
		rat	SHR		CC513	IV	CC	IV C	CC-M-IV		0						na	16	0		0	0	12.5	1.5	0	2022-02-07	BCCB2049	2022-04-07	2022-02-07	5ml	CC510 IV D	CC511 IV F	CC512 IV C	CC513 IV C
		rat	SHR		CC514	IV	CC	IV D	CC-M-IV		0						na	10	0		0	0	12.5	1.5	0	2022-01-31	B3041B05/B4003B04	2022-12-31	2022-02-07		CC514 IV D	CC515 IV F	CC516 IV C	CC517 IV C
		rat	SHR		CC515	IV	CC	IV F	CC-M-IV		0						na	72	0		0	0	12.5	1.5	0	2021-11-08	Y341271	2022-05-08	2022-02-07		CC518 IV D	CC519 IV F	CC520 IV C	CC521 IV C
		rat	SHR		CC516	IV	CC	IV C	CC-M-IV		0						na	16	0		0	0	12.5	1.5	0	2022-02-07	BCCB2049	2022-04-07	2022-02-07		CC522 IV D	CC523 IV F	CC524 IV C	CC525 IV C
		rat	SHR		CC517	IV	CC	IV C	CC-M-IV		0						na	16	0		0	0	12.5	1.5	0	2022-02-07	BCCB2049	2022-04-07	2022-02-07		CC526 IV D	CC527 IV F	CC528 IV C	CC529 IV C
		rat	SHR		CC518	IV	CC	IV D	CC-M-IV		0						na	10	0		0	0	12.5	1.5	0	2022-01-31	B3041B05/B4003B04	2022-12-31	2022-02-07
		rat	SHR		CC519	IV	CC	IV F	CC-M-IV		0						na	72	0		0	0	12.5	1.5	0	2021-11-08	Y341271	2022-05-08	2022-02-07
		rat	SHR		CC520	IV	CC	IV C	CC-M-IV		0						na	16	0		0	0	12.5	1.5	0	2022-02-07	BCCB2049	2022-04-07	2022-02-07
		rat	SHR		CC521	IV	CC	IV C	CC-M-IV		0						na	16	0		0	0	12.5	1.5	0	2022-02-07	BCCB2049	2022-04-07	2022-02-07
		rat	SHR		CC522	IV	CC	IV D	CC-M-IV		0						na	10	0		0	0	12.5	1.5	0	2022-01-31	B3041B05/B4003B04	2022-12-31	2022-02-07
		rat	SHR		CC523	IV	CC	IV F	CC-M-IV		0						na	72	0		0	0	12.5	1.5	0	2021-11-08	Y341271	2022-05-08	2022-02-07
		rat	SHR		CC524	IV	CC	IV C	CC-M-IV		0						na	16	0		0	0	12.5	1.5	0	2022-02-07	BCCB2049	2022-04-07	2022-02-07
		rat	SHR		CC525	IV	CC	IV C	CC-M-IV		0						na	16	0		0	0	12.5	1.5	0	2022-02-07	BCCB2049	2022-04-07	2022-02-07
		rat	SHR		CC526	IV	CC	IV D	CC-M-IV		0						na	10	0		0	0	12.5	1.5	0	2022-01-31	B3041B05/B4003B04	2022-12-31	2022-02-07
		rat	SHR		CC527	IV	CC	IV F	CC-M-IV		0						na	72	0		0	0	12.5	1.5	0	2021-11-08	Y341271	2022-05-08	2022-02-07
		rat	SHR		CC528	IV	CC	IV C	CC-M-IV		0						na	16	0		0	0	12.5	1.5	0	2022-02-07	BCCB2049	2022-04-07	2022-02-07
		rat	SHR		CC529	IV	CC	IV C	CC-M-IV		0						na	16	0		0	0	12.5	1.5	0	2022-02-07	BCCB2049	2022-04-07	2022-02-07
1	1	mouse	aged	female				4 female
1	1	mouse	aged	male				4 male
2	2	mouse	aged	female
2	2	mouse	aged	male
3	3	mouse	aged	female
3	3	mouse	aged	male																																		0
4	4	mouse	aged	female																																		0
4	4	mouse	aged	male		1 week 8 animals																									0	0	0	0	0	0	0	0
5	5	rat	SHR	female																											0	0	0	0	0	0	0	0
5	5	rat	SHR	male				4 female
6	6	rat	SHR	female				4 male
6	6	rat	SHR	male
7	7	rat	SHR	female
7	7	rat	SHR	male
8	8	rat	SHR	female
8	8	rat	SHR	male		1 week 8 animals
9	9	mouse	aged	female				4 female
9	9	mouse	aged	male				4 male
10	10	mouse	aged	female
10	10	mouse	aged	male
11	11	mouse	aged	female
11	11	mouse	aged	male
12	12	mouse	aged	female
12	12	mouse	aged	male		1 week 8 animals
13	13	rat	SHR	male
13	13	rat	SHR	female				4 female
14	14	rat	SHR	male				4 male
14	14	rat	SHR	female
15	15	rat	SHR	male
15	15	rat	SHR	female
16	16	rat	SHR	male
16	16	rat	SHR	female		1 week 8 animals

## Sheet: Table 5
Form	Field applied to	Conditional upon what field	Results (fill, highlight, etc)	Conditional format/formula	alert to user
MISS	Treatment vial ID	animal ID assignment	fills in vial ID in red	=NOT(ISBLANK($Animal ID))	that the vial has been assigned to an animal
MISS	Anticipated surgery date	blank surgery date and blank animal ID	fills in surgery date in red	=AND($anticipated surgery date<>"",$expiration datre1<=TODAY(), $animal ID assignment="")	if the vial has not been assigned to an animal and the expiration date has passed
MISS	Treatment vial ID	empty surgery date and expired date	fills in vial ID in red	=AND($surgery date<>"",$surgery date>=$expiration date)	if vial is unused but past the expiration date, the vial ID will turn red
MISS	Type of administration and treatment	being with IV or IP	fills in either green or blue		visual cue for IV and IP
MISS	weight in kg (hidden column)	weight in kg	converts weight in grams to kilograms	=weight in grams/1000	most animals are weighed in grams
MISS	species	model	if shr model is entered, rat, if not, mouse	=IF(species="shr","rat","mouse")
MISS	diluent	type of administration	enters either water or na	=IF(type of administration="IP","water","na")
MISS	dose rate (mg/kg)	treatment	enters dose of treatment	=IF(treatment="IP Treatment E","10", IF(treatment="IV Treatment D","10", IF(treatment="IP control","72", IF(treatment="IV Treatment A","16", IF(treatment="IP Treatment C","0.5", IF(treatment="IV control", "72", IF(AND(treatment="IV Treatment B",species="rat"),"10","100")))))))
MISS	dose in mg	weight and dose rate	enters dose based on weight of animals	=(weight in kg*dose rate)
MISS	verifier initials	animal randomized but not verified	highlights in green (if not randomized yet, no fill color)	=AND($verifier="",$randomizer="JL")
MISS	Volume water to add (mls)	type of administration and species	enters diluent volume	=IF(AND(type of administration="IP",species="rat"),"27.2","4.4")
MISS	Rate of Infusion (ml/hr)	dose of treatment	enters rate of infusion	=dose of treatment (mls)*3
MISS	working concentration (mg/ml)	treatment and species	enters working concentration of treatment	=IF(treatment="IP Treatment E","1.25", IF(treatment="IV Treatment D","1.25", IF(treatment="IP control","9", IF(treatment="IV Treatment A","2", IF(treatment="IP Treatment C","0.0625", IF(treatment="IV control", "9", IF(AND(treatment="IV Treatment B",species="rat"),"1.25","12.5")))))))
MISS	number of doses	treatment	enters number of doses	=IF(treatment="IP Treatment E","8", IF(treatment="IV Treatment D","1.5", IF(treatment="IP control","8", IF(treatment="IV Treatment A","1.5", IF(treatment="IP Treatment C","8", IF(treatment="IV control", "1.5", IF(treatment="IV Treatment B","1.5")))))))
MISS	calculates how much is need to be packaged including the extra needed	number of doses and volume	enters total volume needed to be packaged including extra	=number of doses*dose of treatment (mls)
MISS	total volume needed to be packaged	same field	highlights in red if calculated volume is higher than what was packaged		animal is either too large and volume is insufficient or weight was entered incorrectly
MISS	sex	same field	highlights in pink	if the cell contains "female"	visual cue
Behavior rater assignment	site assigned to rate	initials when assigned	highlights in yellow
Behavior rater assignment	source site of grid video	if the source site matches the assigned site; prevents site from being assigned its own video to rate	highlights in red
